# Supplementary material for: Effects of water table level and nitrogen deposition on methane and nitrous oxide emissions in an alpine peatland
Source: Copernicus journal article supplement (doi:10.5194/bg-19-5187-2022), 2022-11-17
Supplement: Supplementary file 1 [file bg-19-5187-2022-supplement.pdf]

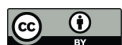

*Supplement of*

## **Effects of water table level and nitrogen deposition on methane and nitrous oxide emissions in an alpine peatland**

**Wantong Zhang et al.**

*Correspondence to:* Jinzhi Wang (wangjz04@126.com)

The copyright of individual parts of the supplement might differ from the article licence.

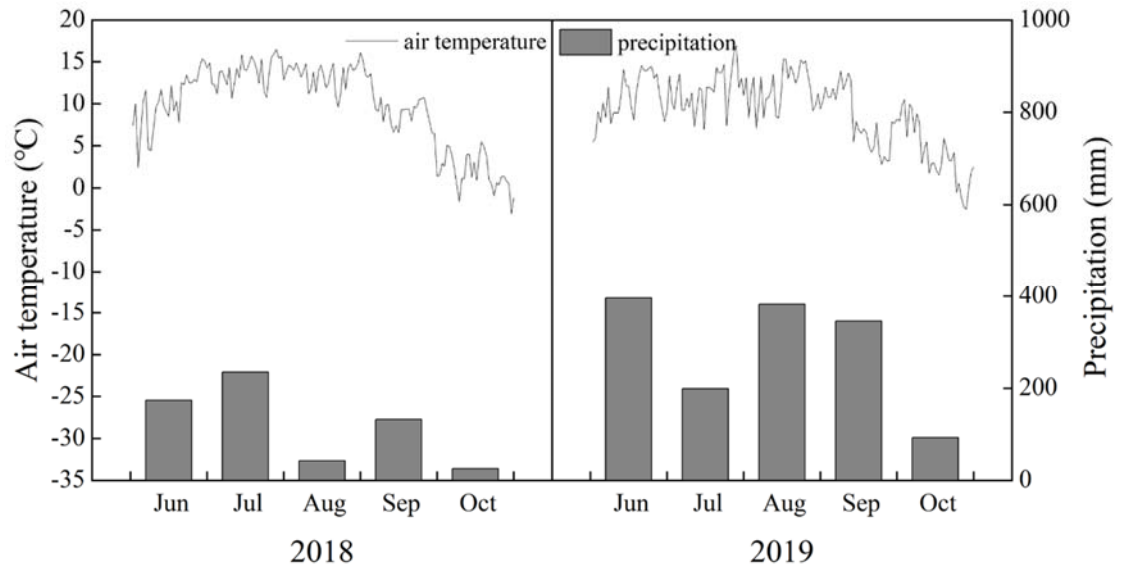

1

2 Figure S1. Variations of daily air temperature and monthly precipitation during the growing seasons in

3 2018 and 2019.

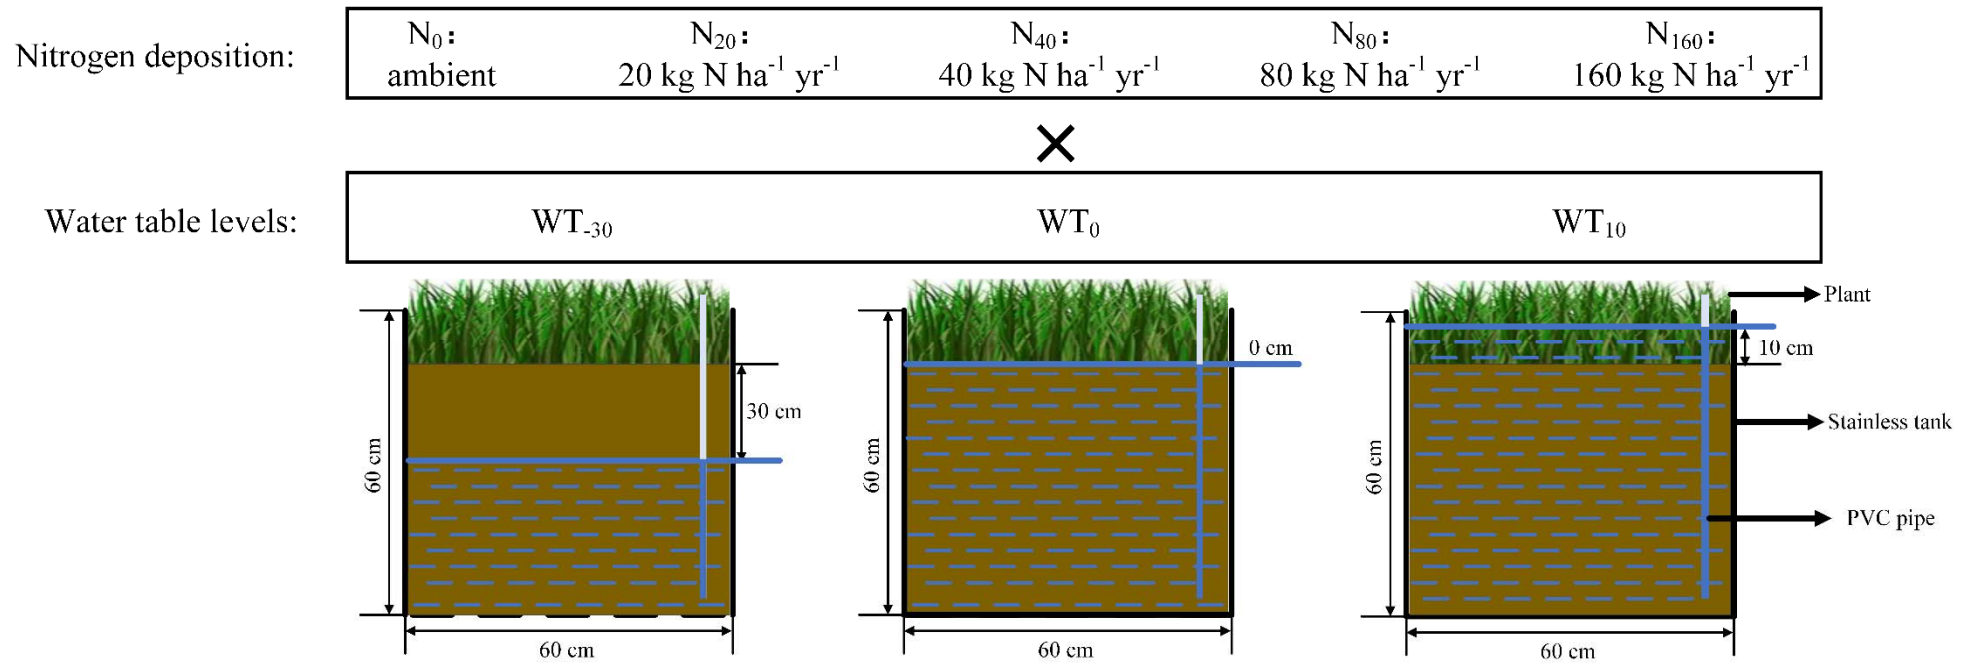

4

5

Figure S2. The sketch map of the experiment system in the present study
